# Supplementary material
Source: PubMed Central journal article supplement (PMC8923063)
Supplement: NIHMS1777382-supplement-Demographics_Table.pdf [file NIHMS1777382-supplement-Demographics_Table.pdf]

Table 1. Demographic Characteristics of Participants (n=22)

| <b>Characteristic</b>                                      | <b>Frequency (%) or Mean (Standard Deviation)</b> |
|------------------------------------------------------------|---------------------------------------------------|
| <b>Gender</b>                                              |                                                   |
| Man                                                        | 13 (59.0%)                                        |
| Woman                                                      | 8 (36.4%)                                         |
| Trans                                                      | 1 (4.6%)                                          |
| <b>Age Mean (SD)</b>                                       | 55                                                |
| <b>Age Category</b>                                        |                                                   |
| 45-55 years                                                | 8 (36.4%)                                         |
| 56-65 years                                                | 11 (50.0%)                                        |
| Unknown                                                    | 2 (9.1%)                                          |
| <b>Race (self-identified)</b>                              |                                                   |
| White                                                      | 4 (18.2%)                                         |
| Black                                                      | 13 (59.0%)                                        |
| Hispanic/Latino                                            | 5 (22.7%)                                         |
| <b>Employment</b>                                          |                                                   |
| Employed part time                                         | 1 (4.6%)                                          |
| Employed – full time                                       | 5 (22.7%)                                         |
| Full-time Caretaker                                        | 4 (18.1%)                                         |
| <b>Medical History</b>                                     |                                                   |
| Depression                                                 | 18 (82.8%)                                        |
| Hx of Drug Use                                             | 16 (72.7%)                                        |
| Additional co-morbidities                                  | 22 (100%)                                         |
| <b>Number of Days Medications Missed (Two-week period)</b> |                                                   |
| <u>0 or None</u>                                           | 5 (23%)                                           |
| <u>One to Three</u>                                        | 10 (45%)                                          |
| <u>Four or more</u>                                        | 7 (32%)                                           |
